# Supplementary material for: Heterochromatic genome instability and neurodegeneration sharing similarities with Alzheimer’s disease in old Bmi1+/− mice
Source: PubMed Central journal article supplement (PMC6346086; doi:10.1038/s41598-018-37444-3), 2019-01-24
Supplement: 41598_2018_37444_MOESM1_ESM.pdf [file 41598_2018_37444_MOESM1_ESM.pdf]

# Heterochromatic genome instability and neurodegeneration sharing similarities with Alzheimer's disease in old *Bmi1*<sup>+/-</sup> mice

**Jida El Hajjar<sup>1</sup>, Wassim Chatoo<sup>1</sup>, Roy Hanna<sup>1</sup>, Patrick Nkanza<sup>1</sup>, Nicolas Tétreault<sup>1</sup>, Yiu  
Chung Tse<sup>2,3</sup>, Tak Pan Wong<sup>2,3</sup>, Mohamed Abdouh<sup>1</sup>, and Gilbert Bernier<sup>1,4,\*</sup>**

<sup>1</sup> Stem Cell and Developmental Biology Laboratory, Maisonneuve-Rosemont Hospital, 5415  
Boul. l'Assomption, Montreal, Canada, H1T 2M4

<sup>2</sup> Department of Psychiatry, McGill University, Montreal, Canada

<sup>3</sup> Douglas Mental Health University Institute, Montreal, Canada

<sup>4</sup> Department of Neurosciences, University of Montreal, Montreal, Canada

\*Corresponding author:

Tel: 514-252-3400 ext. 4648

Fax: 514-253-7626

E-mail: [gbernier.hmr@ssss.gouv.qc.ca](mailto:gbernier.hmr@ssss.gouv.qc.ca)

## Content:

Supplementary Figures Legends

5 Supplementary Figures

1 Supplementary Table

## SUPPLEMENTAL FIGURE LEGENDS

**Figure S1. Old *Bmi1*<sup>+/-</sup> mice show increased total Tau levels in the cortex**

(a) Western blot analysis of cortices from 22-27 month (M)-old WT and *Bmi1*<sup>+/-</sup> mice revealing elevated Tau levels (k9JA antibody).

(b) Quantification of results presented in (a). The *Bmi1*/GAPDH and Tau/GAPDH ratio were normalized to 1 for WT mice, revealing the relative expression levels in *Bmi1*<sup>+/-</sup> mice. Values are mean ± SEM. (\*)  $P < 0.05$ ; (\*\*) $< 0.01$ ; Student's t-test.

**Figure S2. Old *Bmi1*<sup>+/-</sup> mice show reduced number of neurons in the hippocampus**

(a) IHC staining for *Bmi1* in the hippocampus (CA2 and dentate gyrus (DG)). Note the reduced *Bmi1* expression level and reduced number of neurons in the *Bmi1*<sup>+/-</sup> (17 month-old) mouse when compared to the WT (26 month-old).

(b) Quantification of the results showed in (a). Results are the sum of quantification of 3 slides/mouse, for a total of 2 *Bmi1*<sup>+/-</sup> mice (16 and 17 month-old) and 2 WT mice (24 and 26 month-old).

(c) Quantification of the number of neurons positive for activated caspase-3 (Casp3). Results are the sum of quantification of 3 slides/mouse, for a total of 2 *Bmi1*<sup>+/-</sup> mice (16 and 17 month-old) and 2 WT mice (24 and 26 month-old). Values are mean ± SEM. (\*)  $P < 0.05$ ; (\*\*) $< 0.01$ ; Student's t-test.

**Figure S3. Some very old *Bmi1*<sup>+/-</sup> mice present extra-cellular amyloid accumulations**

(a-b) Note the accumulation of amyloid deposits in the cortex and hippocampus of an old *Bmi1*<sup>+/-</sup> mouse (24 months) as shown using the DE2B4 antibody.

(b) High-resolution composite (top) and high-resolution cropped (bottom) images from (a) showing extra-cellular amyloid plaque-like accumulations (black arrows) in the hippocampus of an old *Bmi1*<sup>+/-</sup> mouse.

(c) Intra-cellular accumulation of amyloid (MOAB2 antibody) in another 24 month-old *Bmi1*<sup>+/-</sup> mouse (arrows).

(d) Composite image showing reduced synaptophysin immuno-reactivity in the hippocampus of an old *Bmi1*<sup>+/-</sup> mouse (same animals as in (c)).

**Figure S4. Reactive gliosis and microglia activation in *APP/Bmi1*<sup>+/-</sup> mice**

IHC staining for GFAP (astrocytes), Iba1 (microglia), activated caspase-3 (apoptosis) and synaptophysin (synapses) on cortical sections of 6 month-old WT, *Bmi1*<sup>+/-</sup>, *APP*, and *APP/Bmi1*<sup>+/-</sup> mice. Note the increase in staining intensity and in the number of positive cells for GFAP, Iba1 and activated caspase-3 in *APP/Bmi1*<sup>+/-</sup> mice when compared to the 3 other genotypes (arrows). In contrast, note the reduced immunoreactivity for synaptophysin in *APP/Bmi1*<sup>+/-</sup> mice when compared to the 3 other genotypes.

**Figure S5. Loss of heterochromatin in *Bmi1*<sup>+/-</sup> neurons is an early event in the disease process**

(a) Western blot on cortical extracts of 3 month-old WT and *Bmi1*<sup>+/-</sup> with quantification of results obtained (left).

(b) IHC on cortical sections from 3 month-old WT and *Bmi1*<sup>+/-</sup> showing loss of heterochromatin compaction in *Bmi1*<sup>+/-</sup> mice, with quantification of the results obtained shown at the left. Scale bar: 5µm. Values are mean ± SEM. (\*)  $P < 0.05$ ; (\*\*)  $P < 0.01$ ; Student's t-test.

(c) ChIP analysis on 18.5 embryonic day WT (n = 3) and *Bmi1*<sup>+/-</sup> (n = 3) cortical neurons. Quantitative PCR was performed in triplicate for each DNA sequence. All data are presented as fold of input. Two-way ANOVA analysis exposed a significant decrease of *Bmi1*, H2A<sup>ub</sup> and H3K9<sup>me3</sup> accumulation at genomic repeats in *Bmi1*<sup>+/-</sup> neurons. (\*)  $P < 0.01$ .

(d) Western blot analysis of cortices from 3 month-old WT and *Bmi1*<sup>+/-</sup> mice showing undetectable expression of AD-related pathological markers in *Bmi1*<sup>+/-</sup> mice. Very faint p53 expression is however possibly present in the *Bmi1*<sup>+/-</sup> samples. Cortices from 15 month-old *Bmi1*<sup>+/-</sup> mice were used as positive control.

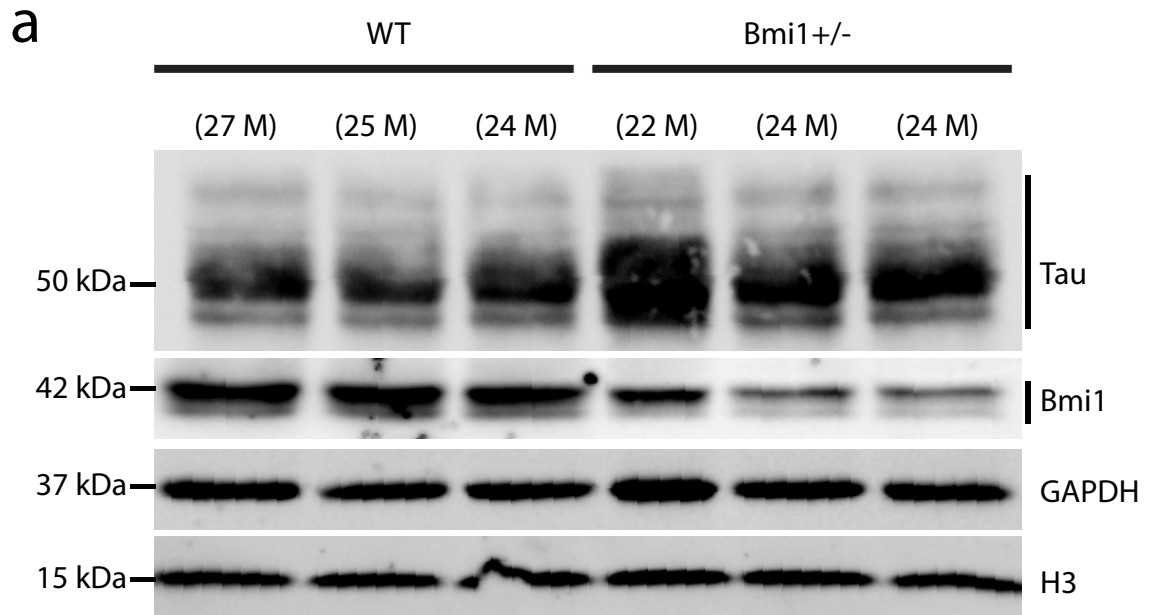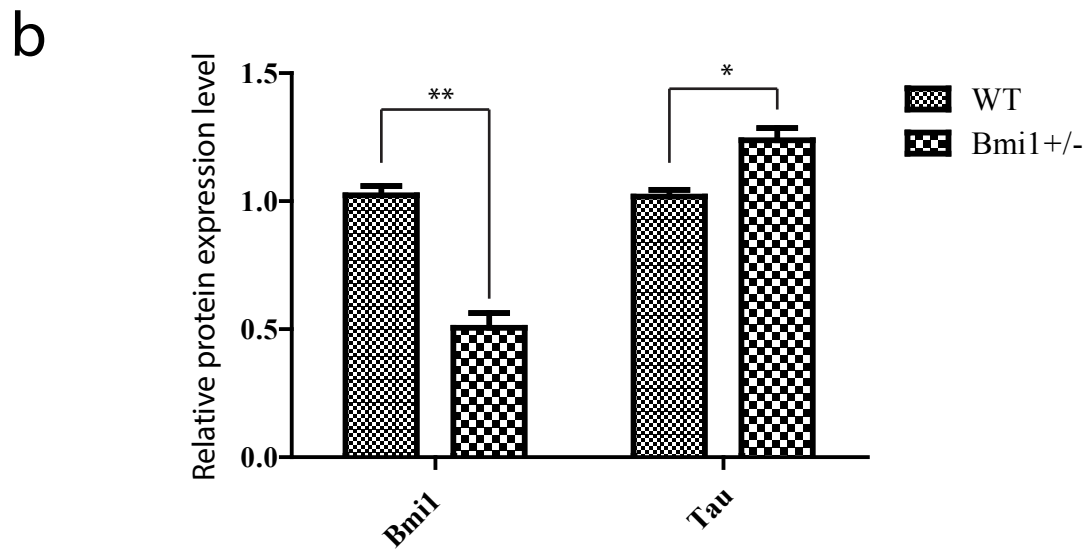

Figure S1

**a**

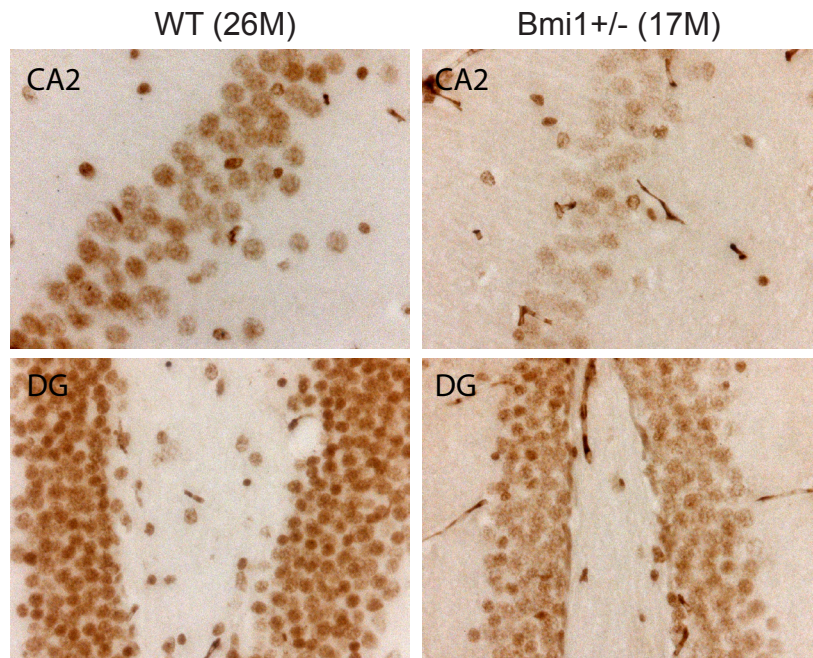

**b**

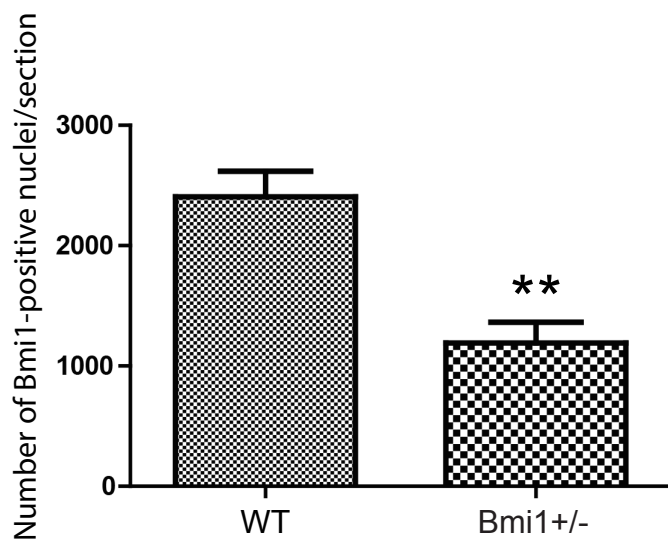

**c**

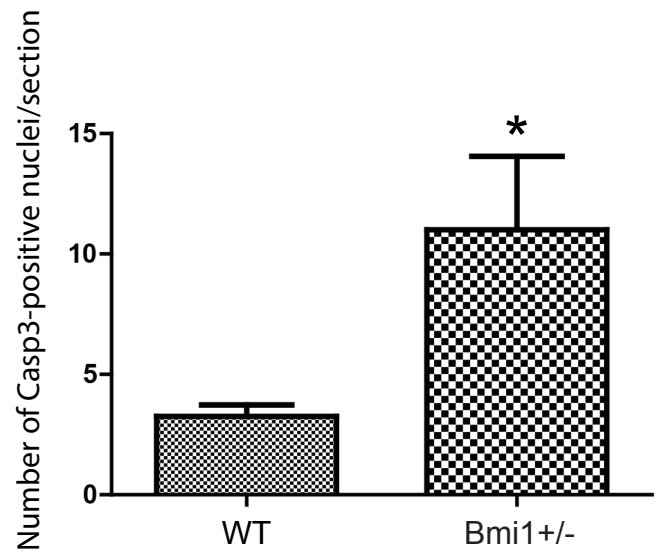

Figure S2



**a**

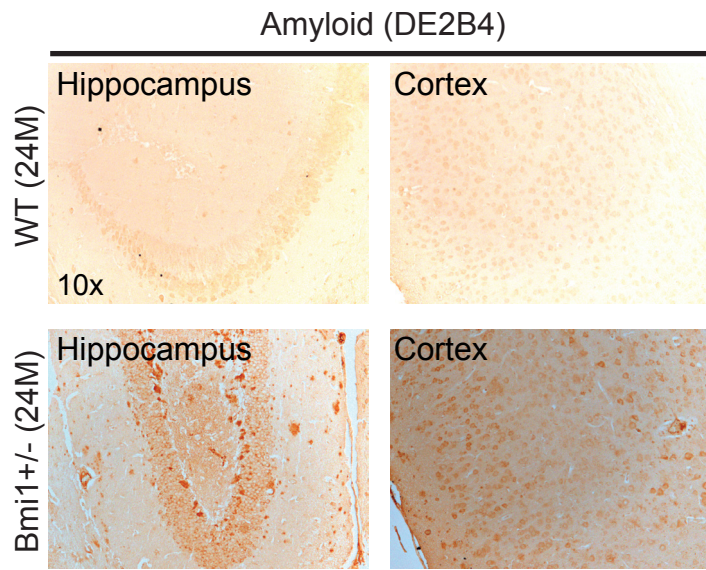

**b**

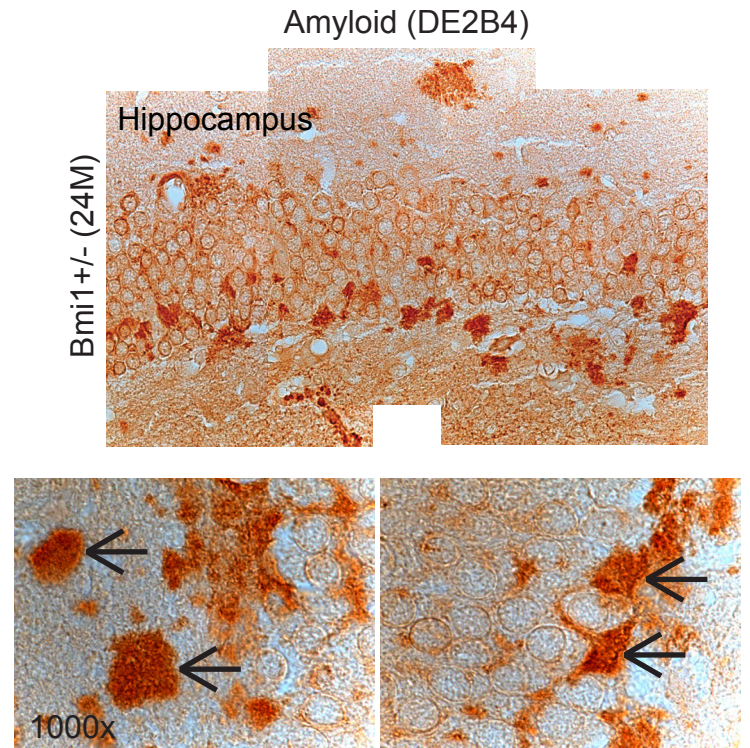

**c**

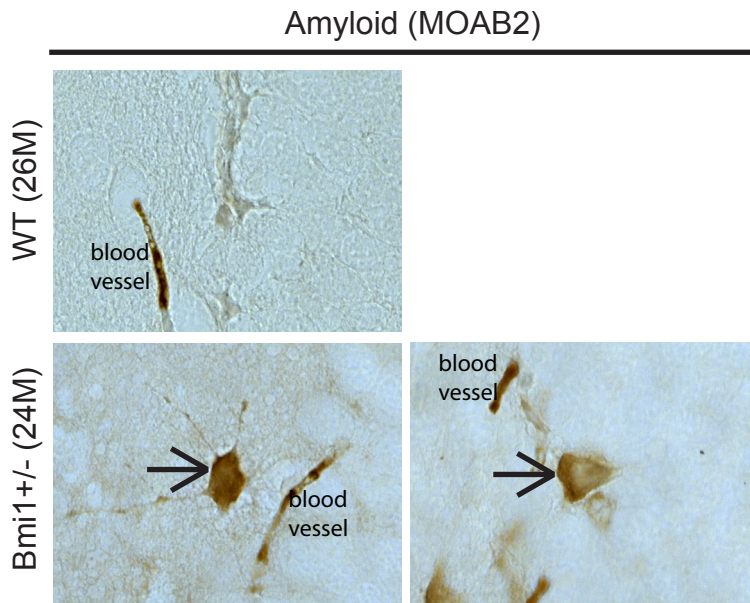

**d**

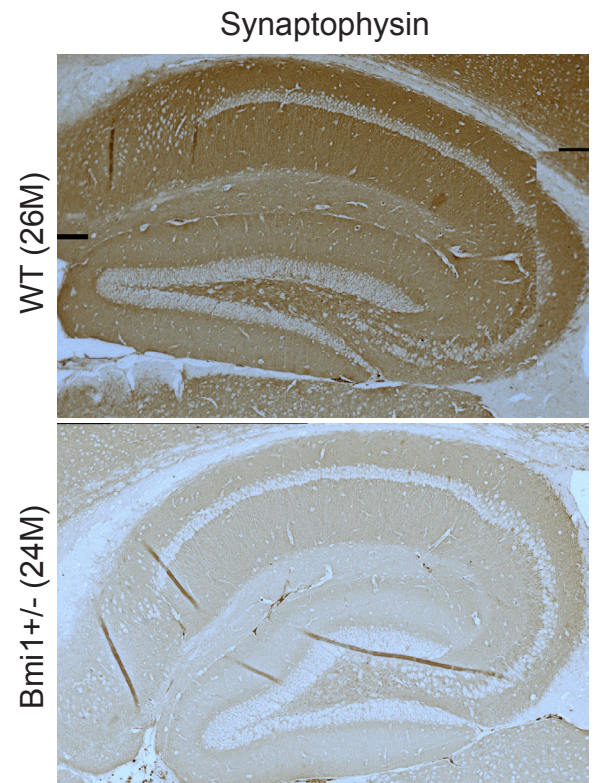

Figure S3



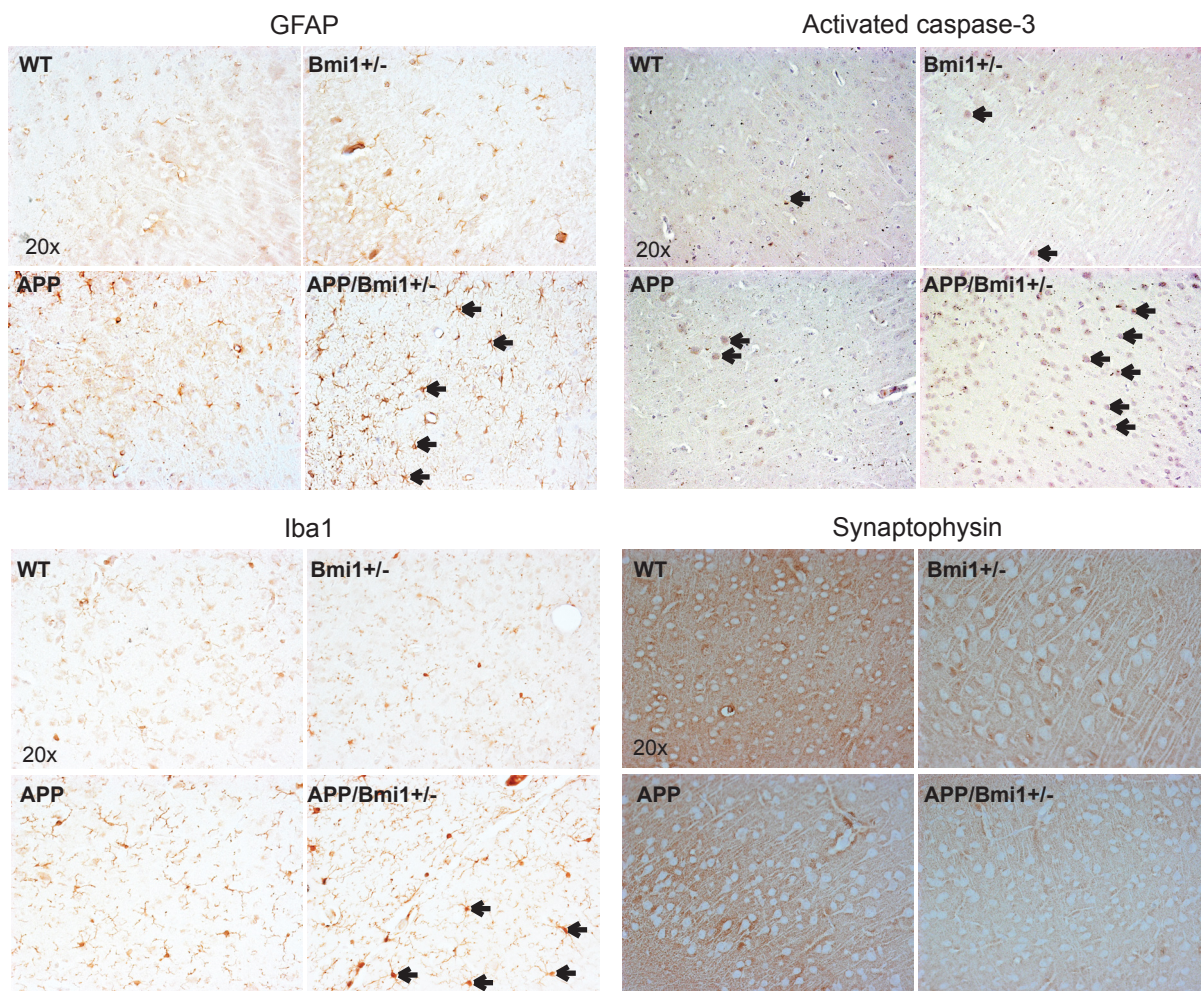

Figure S4

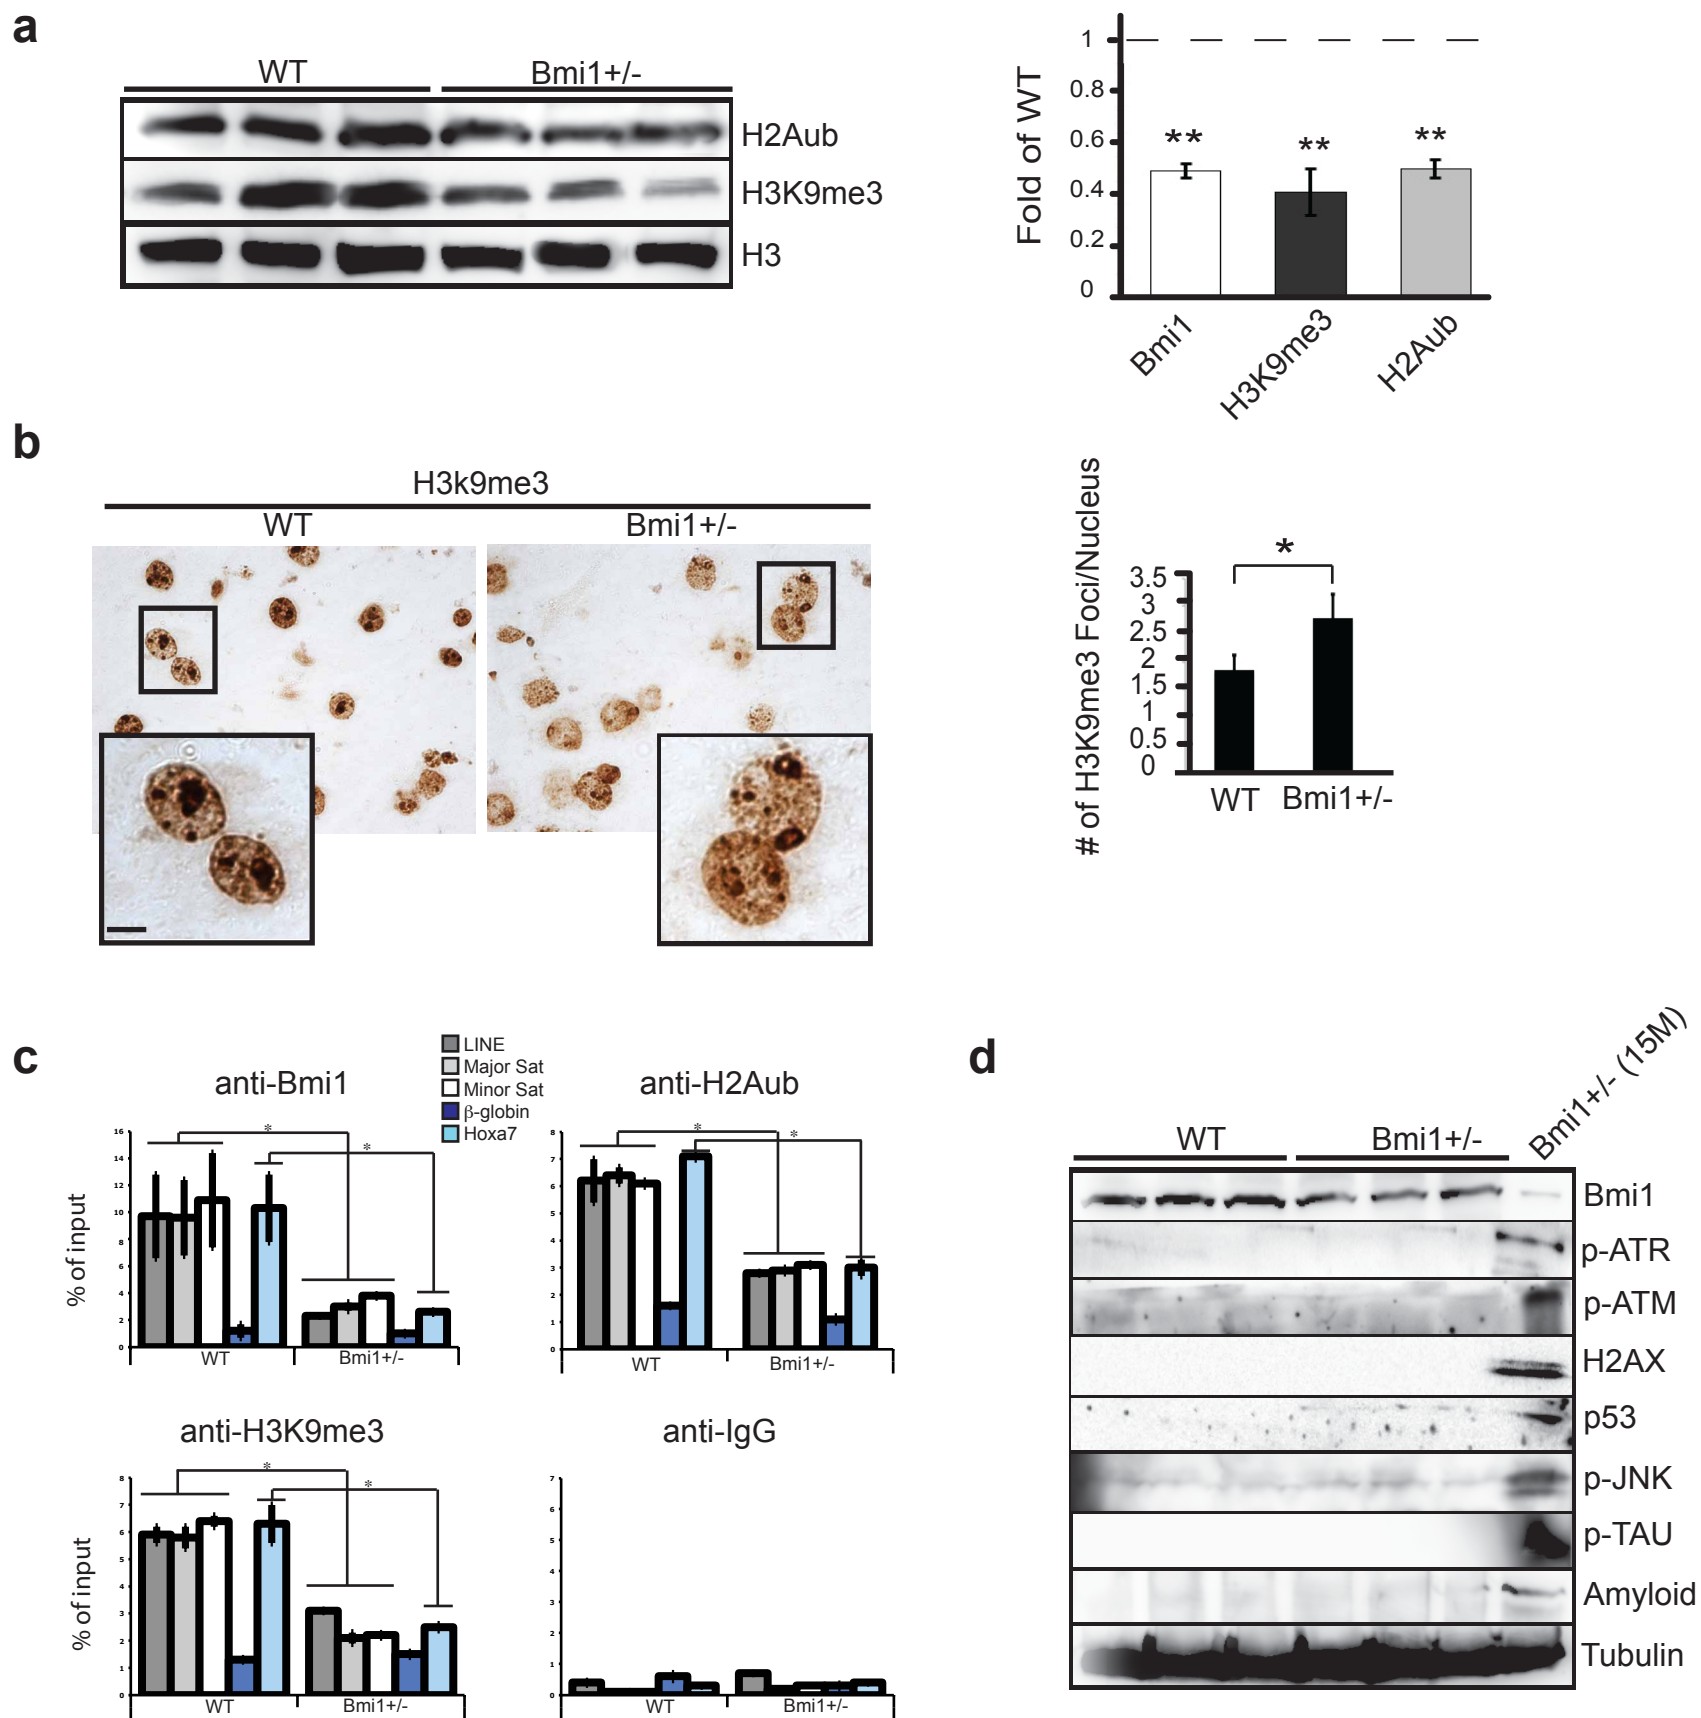

Figure S5



|                                      |
|--------------------------------------|
| <b>Western blot and CHIP samples</b> |
|--------------------------------------|

|                              | <u>DH-Id # of samples</u> | <u>Sex</u> | <u>Age (yrs)</u> | <u>Median Age (yrs)</u> |
|------------------------------|---------------------------|------------|------------------|-------------------------|
| <b><i>Frontal Cortex</i></b> |                           |            |                  |                         |
| <b><i>(Frozen)</i></b>       |                           |            |                  |                         |
| <b>Old controls</b>          | 428                       | M          | 89               | <b>87.3</b>             |
|                              | 488                       | F          | 86               |                         |
|                              | 616                       | F          | 86               |                         |
|                              | 727                       | M          | 87               |                         |
|                              | 881                       | M          | 85               |                         |
|                              | 1487                      | F          | 91               |                         |
| <b>LOAD</b>                  | 999                       | F          | 87               | <b>87.2</b>             |
|                              | 1018                      | M          | 88               |                         |
|                              | 1073                      | M          | 85               |                         |
|                              | 1127                      | M          | 88               |                         |
|                              | 1157                      | F          | 85               |                         |
|                              | 1599                      | F          | 90               |                         |
| <b><i>Hippocampus</i></b>    |                           |            |                  |                         |
| <b><i>(Frozen)</i></b>       |                           |            |                  |                         |
| <b>Young controls</b>        | 1388                      | M          | 57               | <b>59</b>               |
|                              | 1705                      | M          | 61               |                         |
|                              | 1722                      | M          | 59               |                         |
| <b>EOAD</b>                  | 1214                      | M          | 64               | <b>61.3</b>             |
|                              | 410                       | M          | 63               |                         |
|                              | 1201                      | M          | 63               |                         |
|                              | 1147                      | F          | 55               |                         |

|                    |
|--------------------|
| <b>IHC samples</b> |
|--------------------|

| <b>Frontal Cortex,<br/>(Fixed)</b> | <u>HMR-Id # of samples</u> | <u>Sex</u> | <u>Age (yrs)</u> | <u>Median Age (yrs)</u> |
|------------------------------------|----------------------------|------------|------------------|-------------------------|
|------------------------------------|----------------------------|------------|------------------|-------------------------|

|                     |          |   |    |             |
|---------------------|----------|---|----|-------------|
| <b>Old controls</b> | 12c00024 | M | 90 | <b>81.8</b> |
|                     | 10c00052 | M | 72 |             |
|                     | 10c00020 | M | 82 |             |
| <b>LOAD</b>         | 10c00088 | M | 75 | <b>84</b>   |
|                     | 10c00042 | M | 89 |             |
|                     | 10c00030 | M | 81 |             |

**Table S1. Human brain samples used in this study**

Late-onset Alzheimer's disease (LOAD) and early-onset Alzheimer's disease (EOAD) samples were all confirmed to present "classical" Alzheimer's disease hallmarks by neuropathology. Old elderly and young controls were also confirmed as non-demented controls by neuropathology.
